# Supplementary material
Source: PubMed Central journal article supplement (PMC3073508)
Supplement: NIHMS254762-supplement-6.pdf [file NIHMS254762-supplement-6.pdf]

# nature

Dear Author,

Your paper may be eligible for our advance online publication (AOP) programme. In this programme, your paper will be published online on *Nature's* website at [www.nature.com/nature](http://www.nature.com/nature) as soon it is typeset and your proof corrections returned. It will be published in print as soon afterwards as space is available. The two versions of the paper are identical.

Our offer of this service is conditional on your agreement to the following:

- Your text, figures and any supplementary information are **all** included when you send us the final version of your paper for formal acceptance, and are **all in Nature-preferred format** (within length and below maximum sizes) as specified in our format instructions at <http://www.nature.com/nature/authors>.
- The corresponding (or otherwise designated) author undertakes to read and return the proofs **within 48 hours** of their receipt.
- The corresponding author signs and returns the "author licence" form **with** the returned proof, **not later**.
- **No changes** can be made to the paper once the online version is published.

Please sign and return this letter, preferably scanned and uploaded with the final version of your manuscript, or fax letter to +44 207 843 4596 if this is not possible. Please specify below the author responsible for returning proofs if different from the corresponding author.

I agree to the above terms and conditions for AOP publication of my paper in *Nature*:

Name: *Chenguang Gong*

Manuscript number: *2010-06-07871C*

Name and contact details (phone, fax and email) of author responsible for returning proofs **if not the corresponding author**:
