# Supplementary material
Source: PubMed Central journal article supplement (PMC3073508)
Supplement: NIHMS254762-supplement-newS2.pdf [file NIHMS254762-supplement-newS2.pdf]

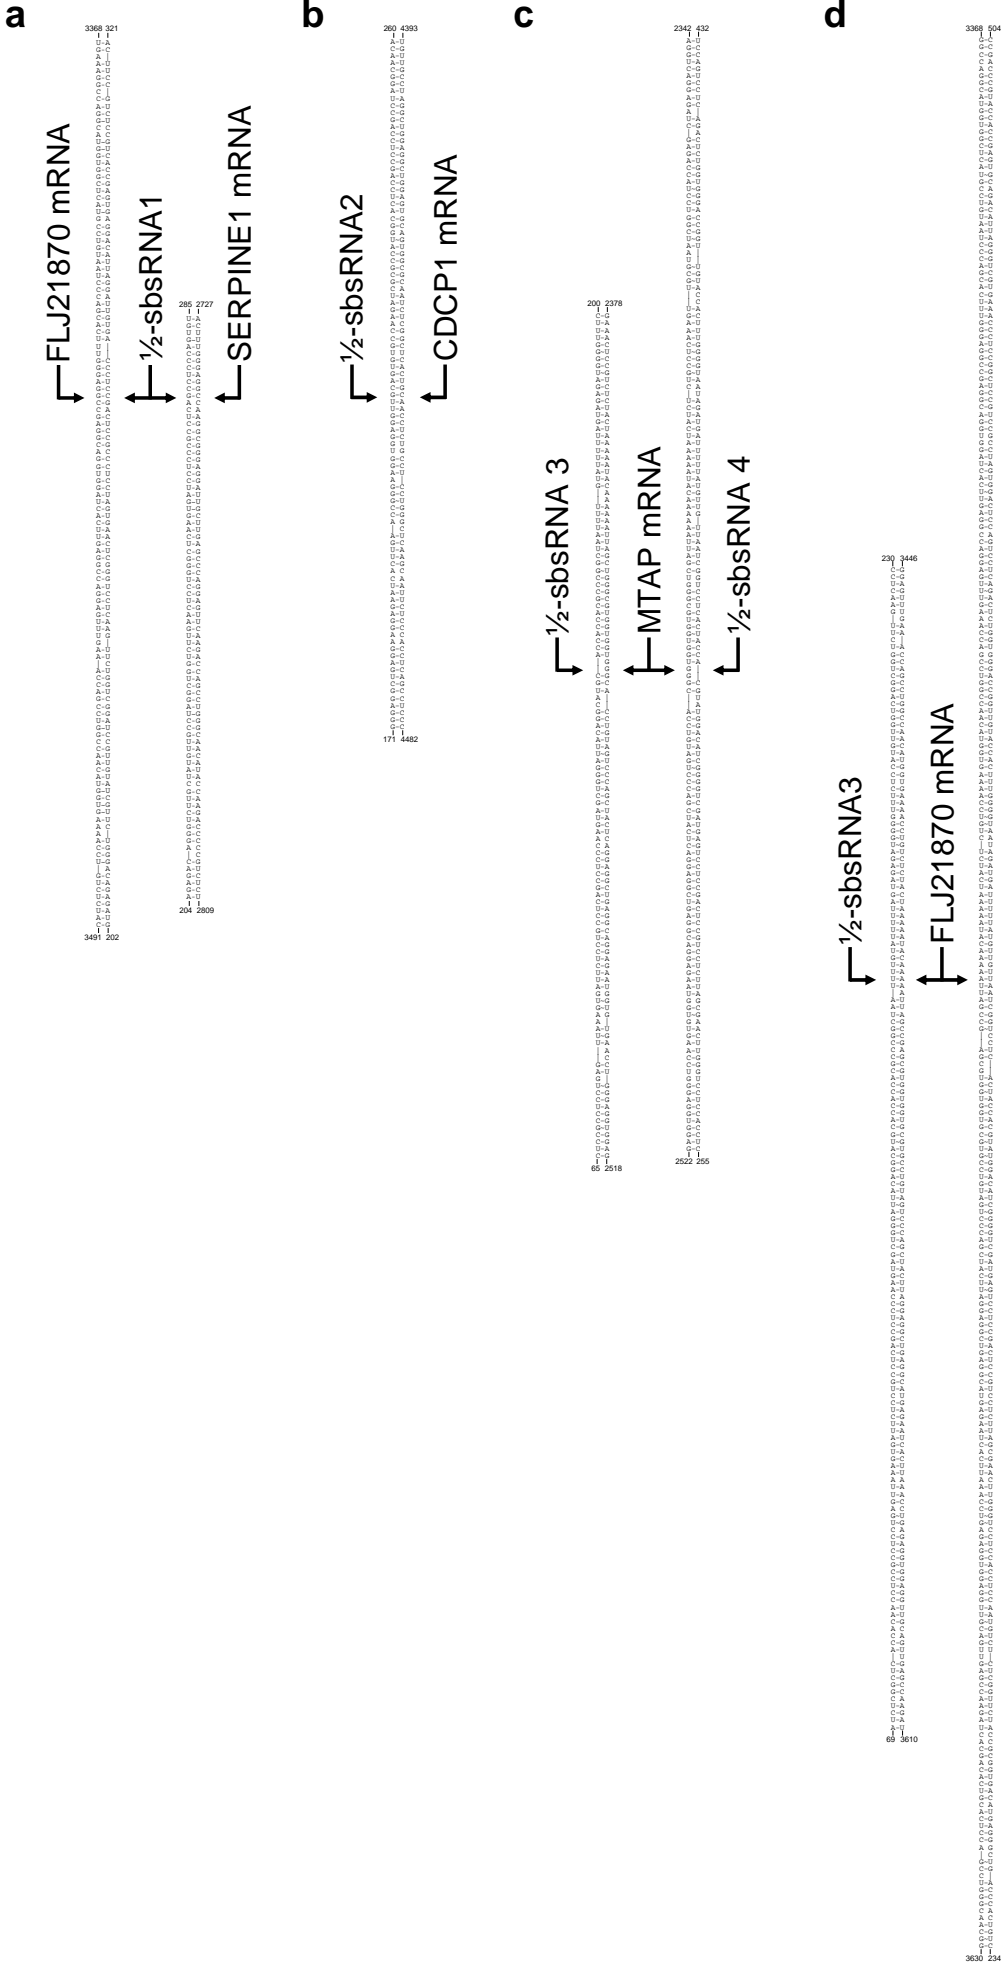

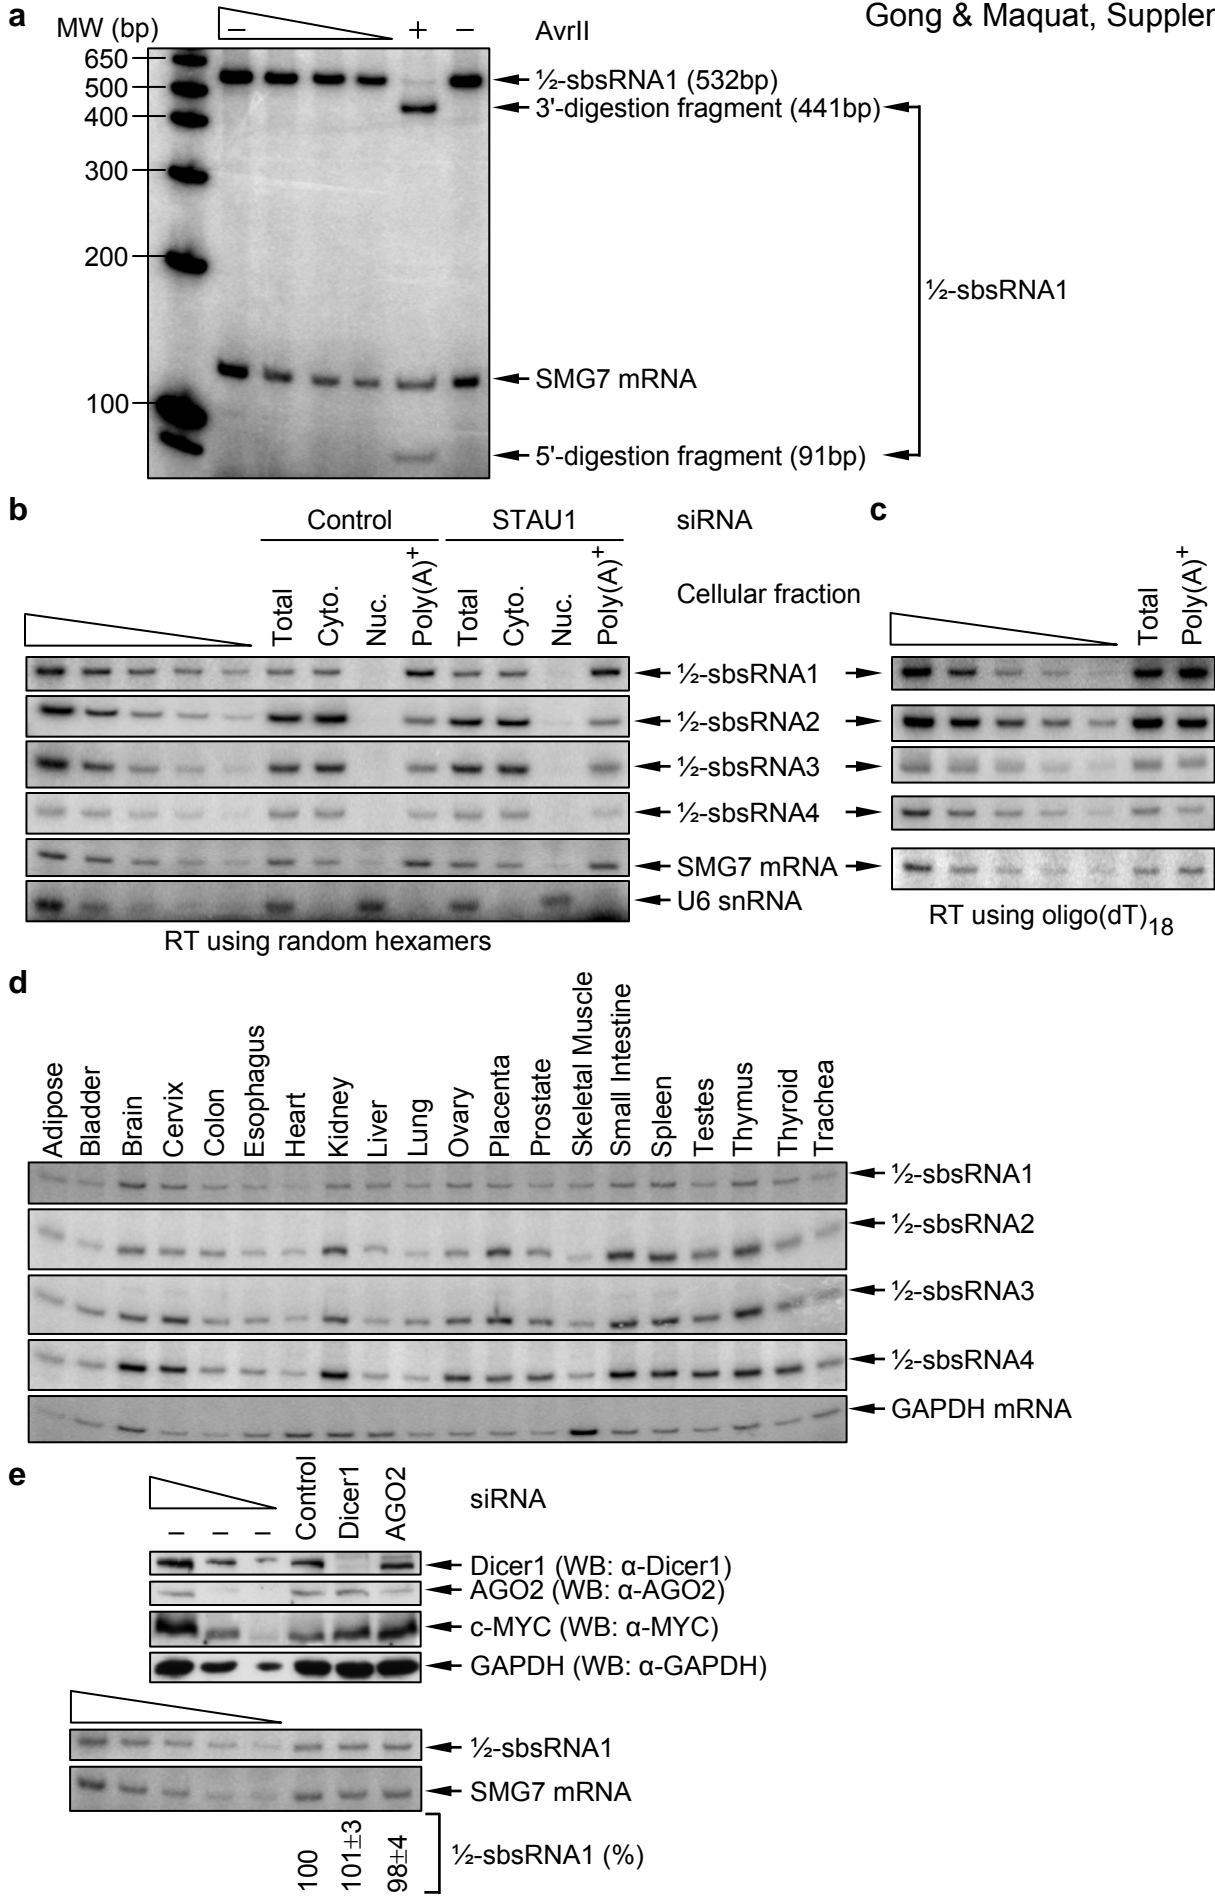

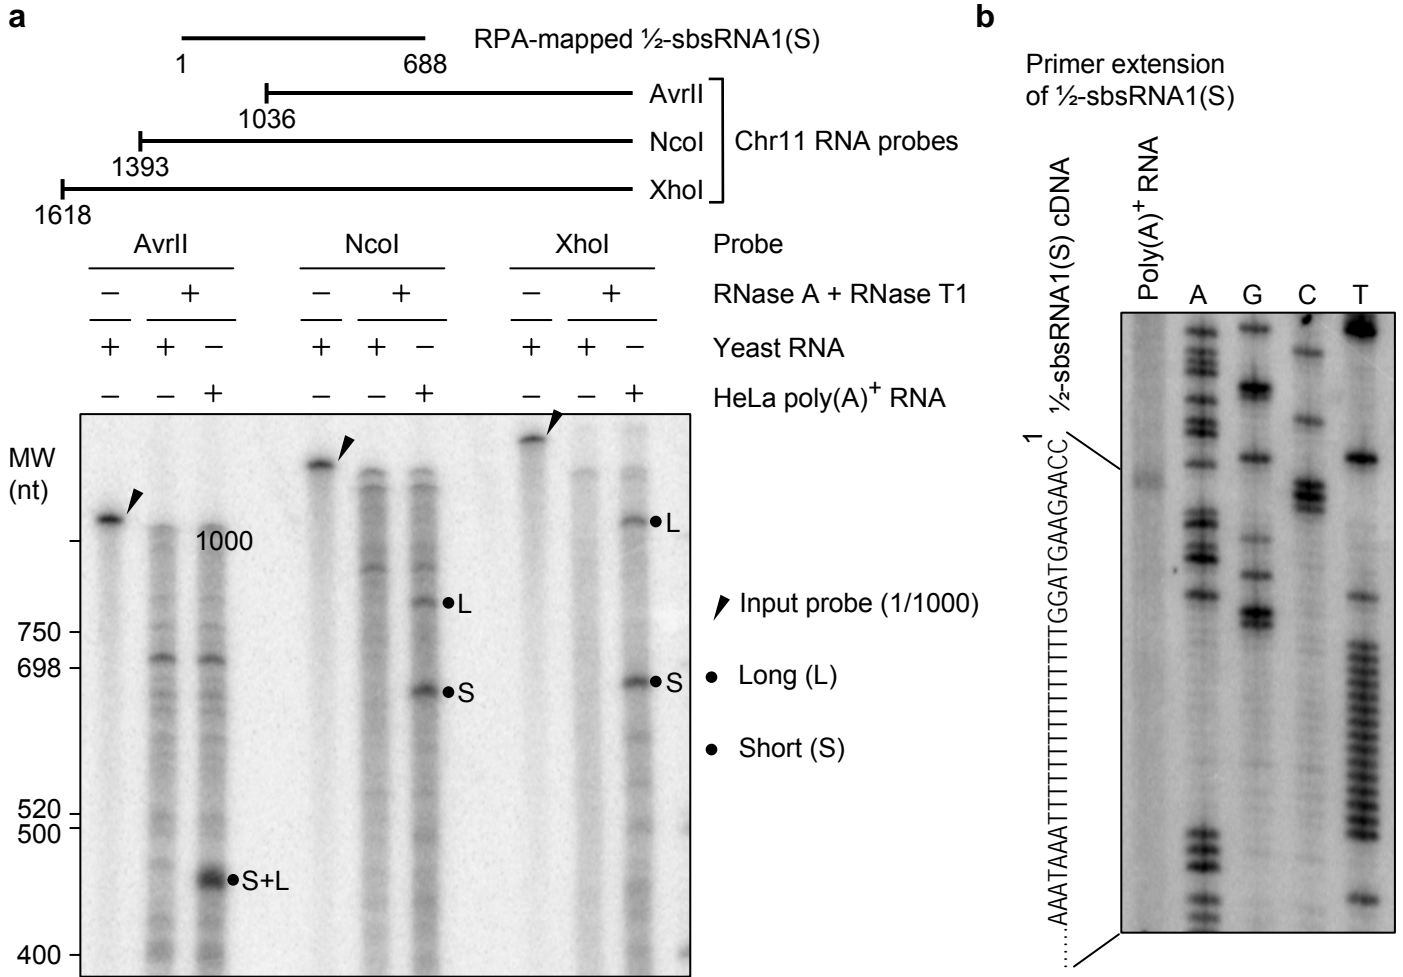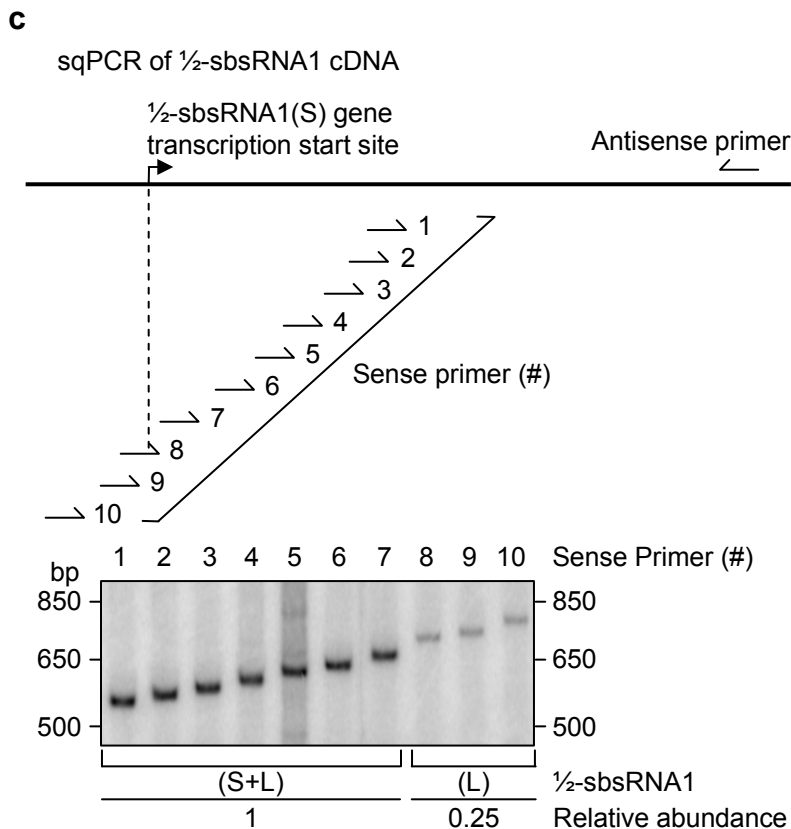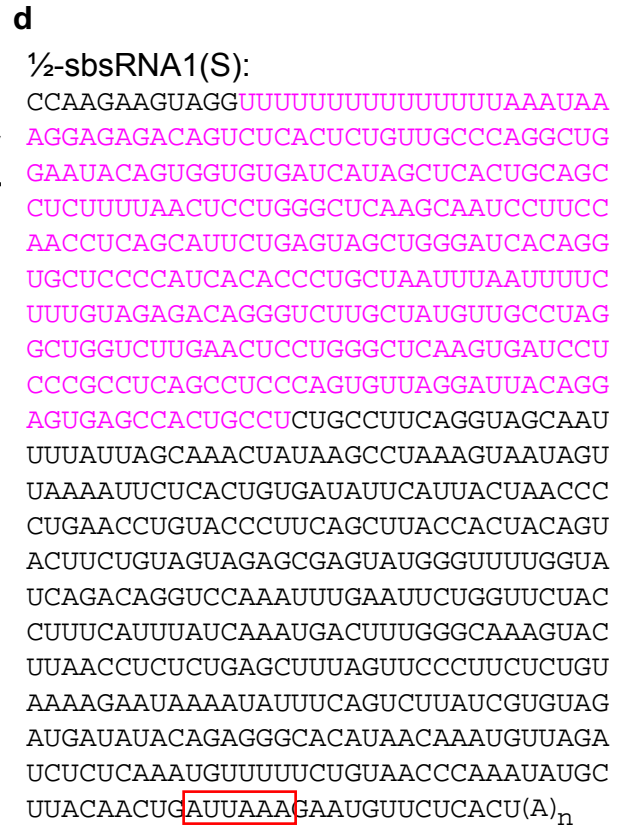

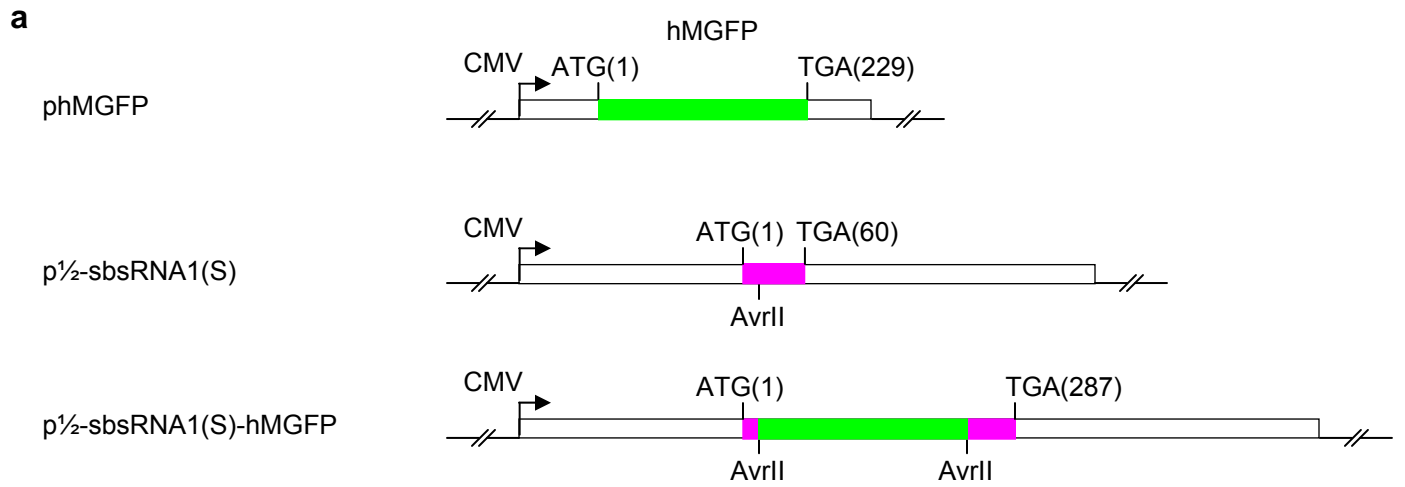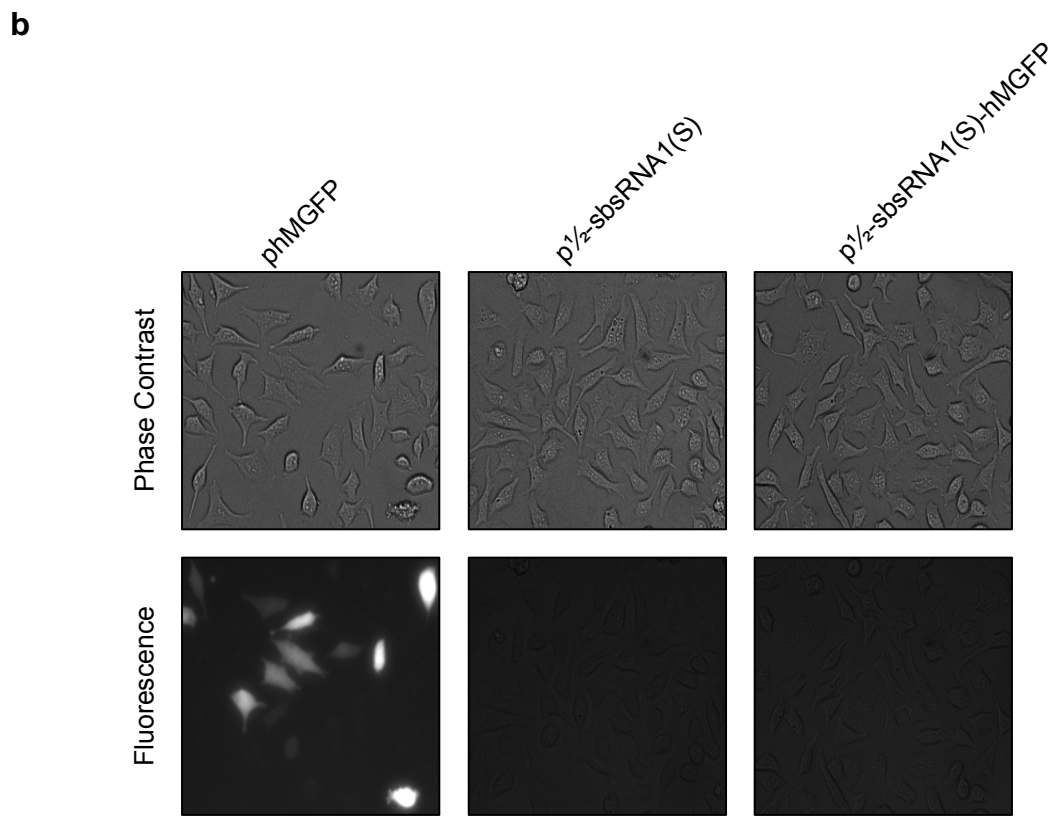

Fig. 1b

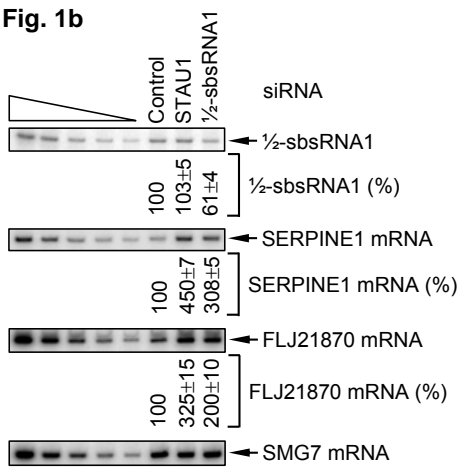

Fig. 1c

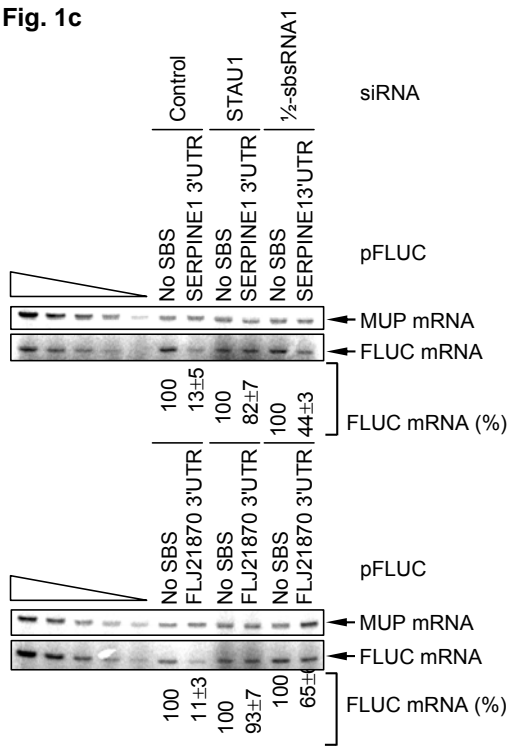

Fig. 1f

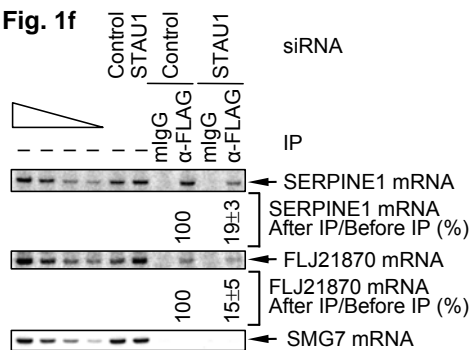

Fig. 2a

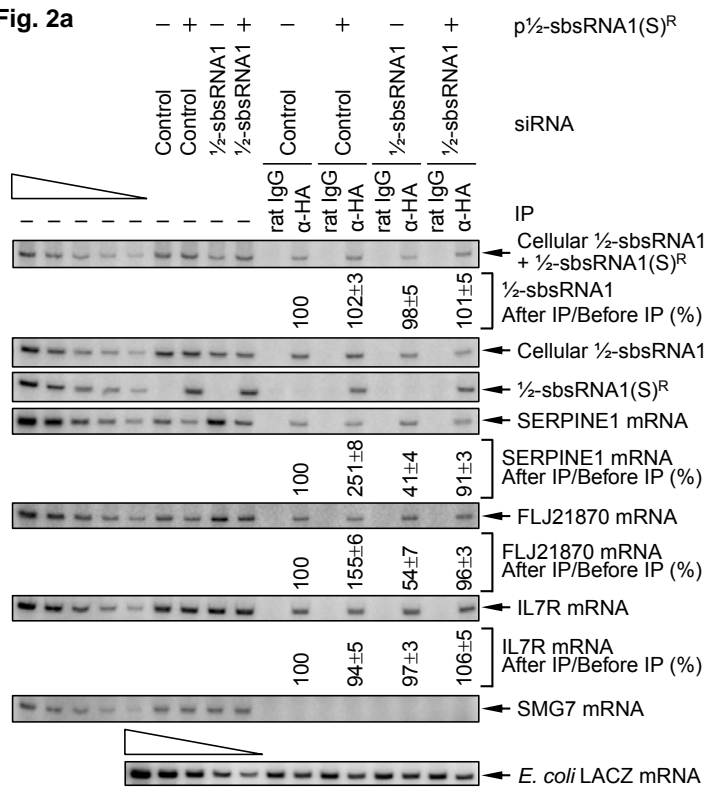

Fig. 2c

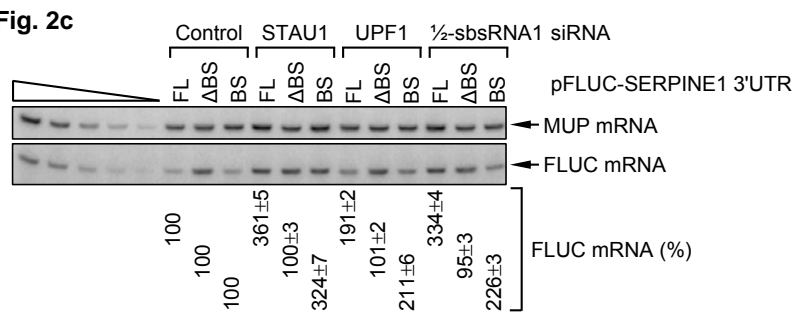

Fig. 3b

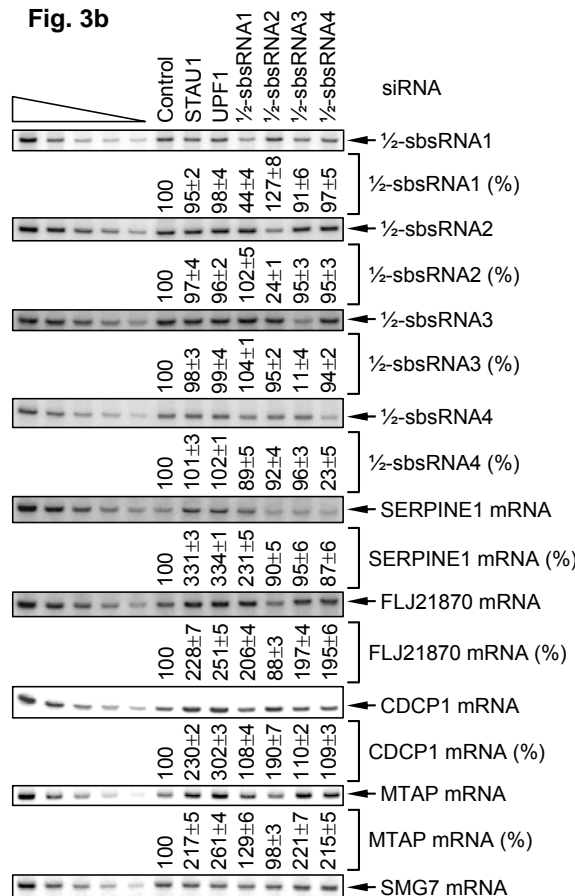

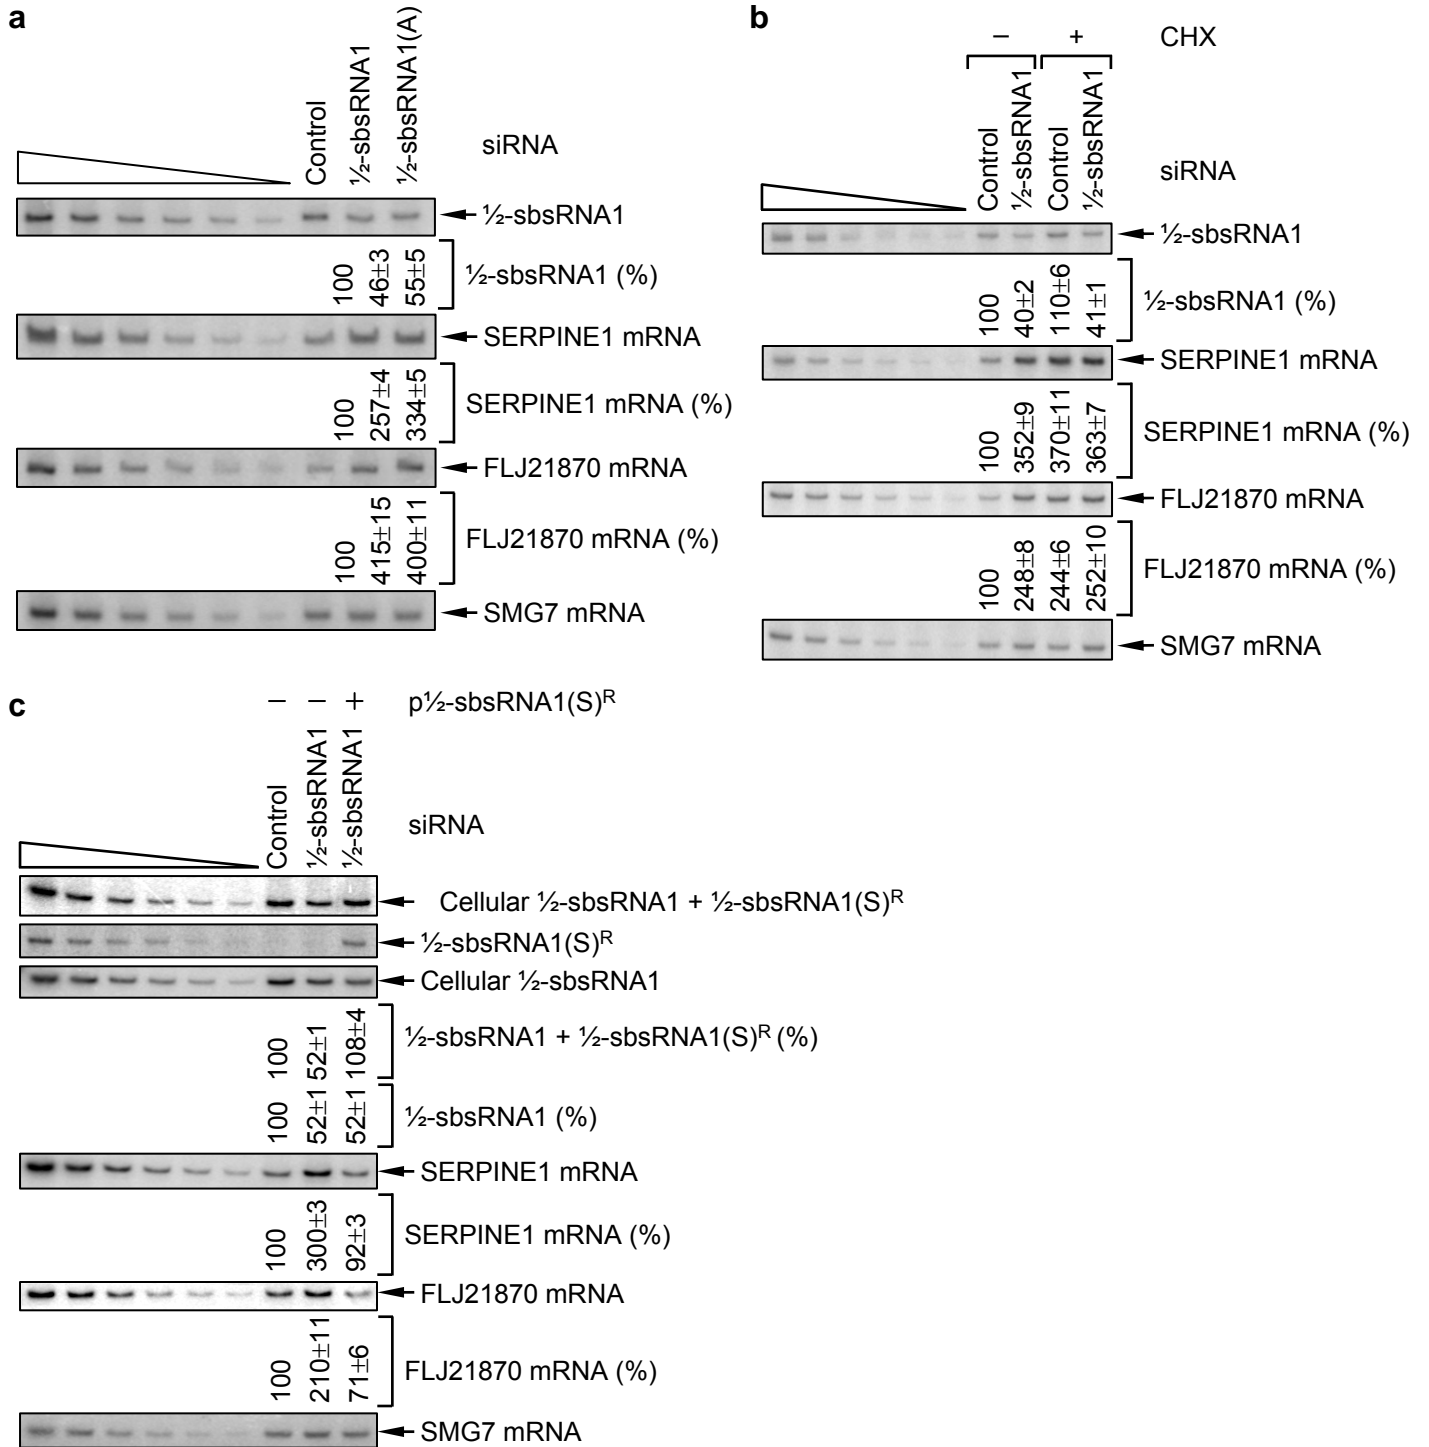

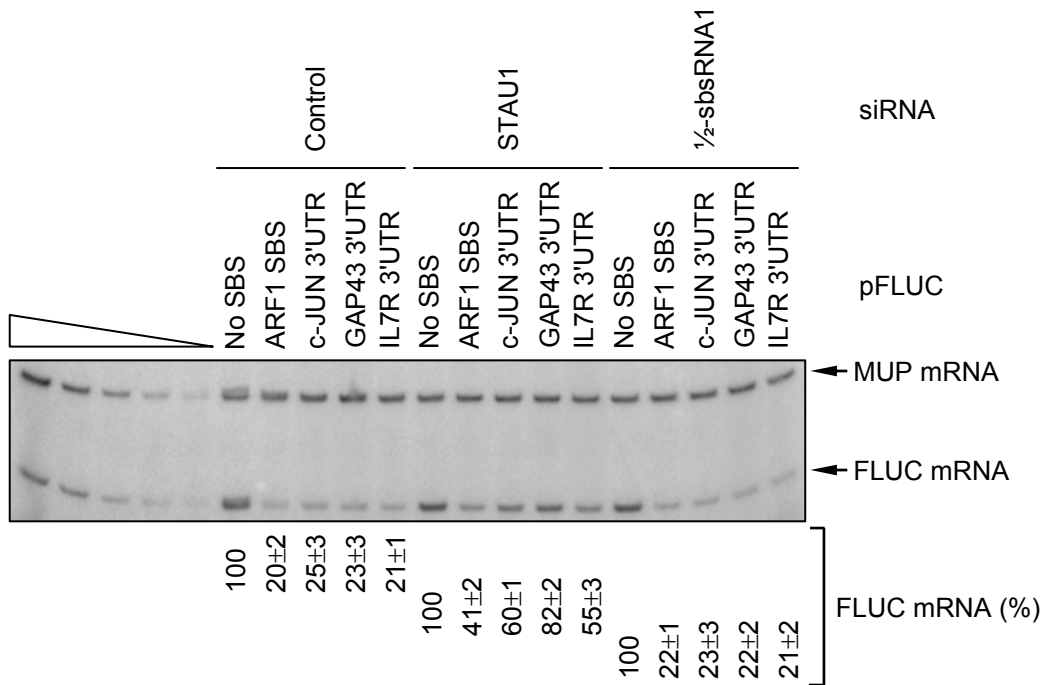

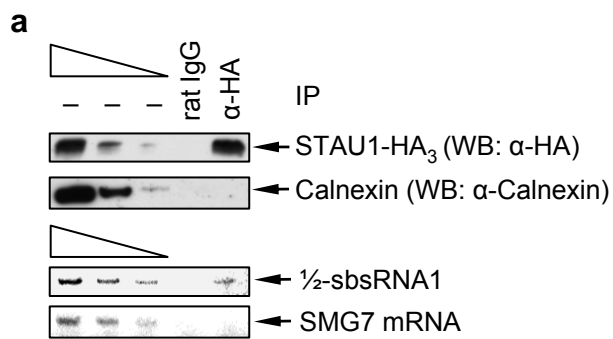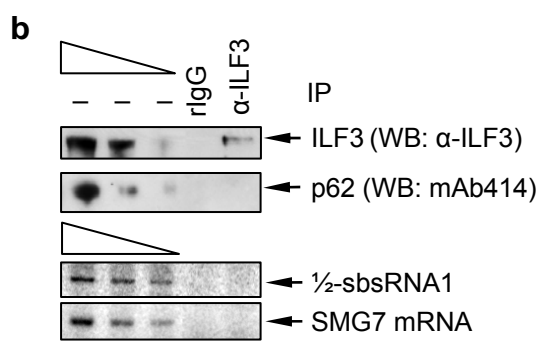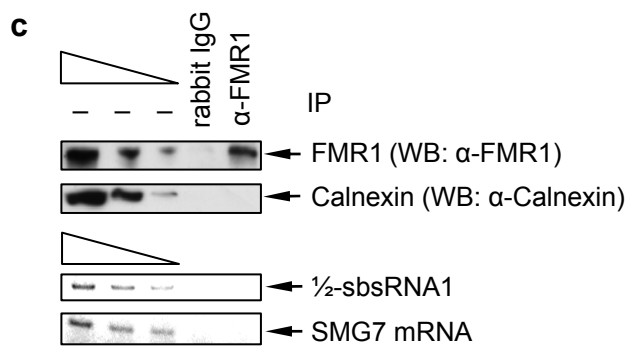





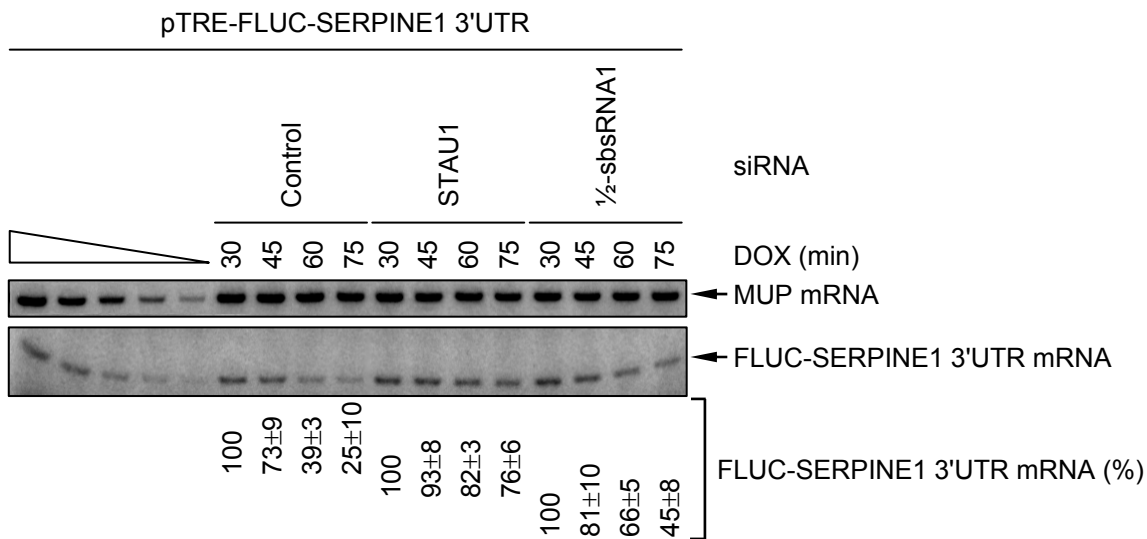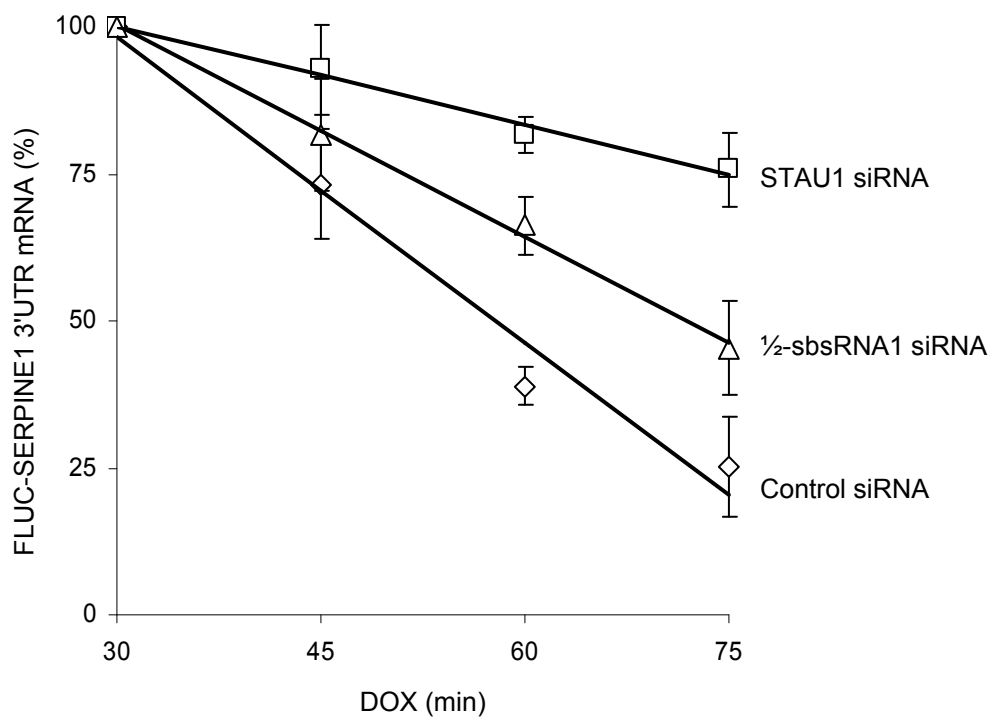

**a**

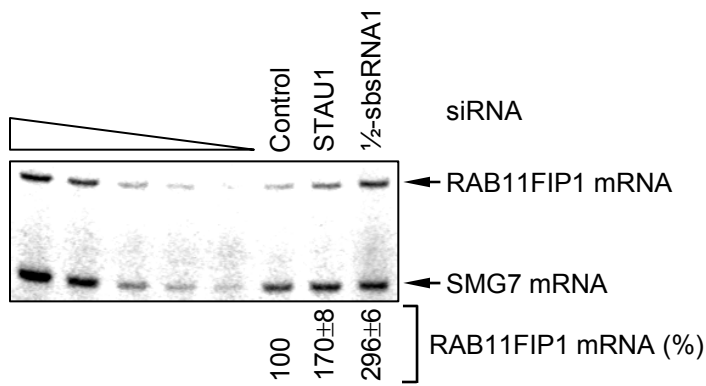

**b**

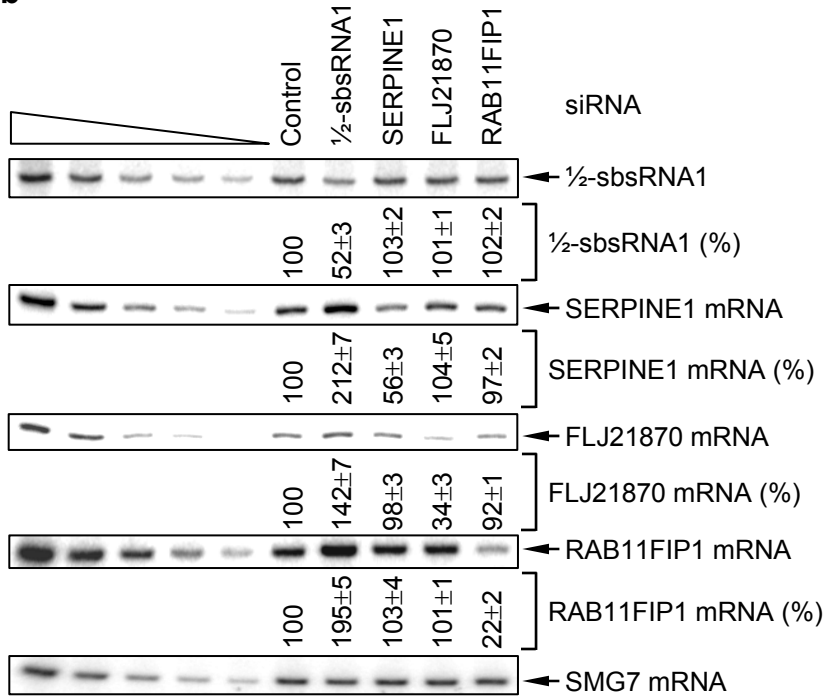

**c**

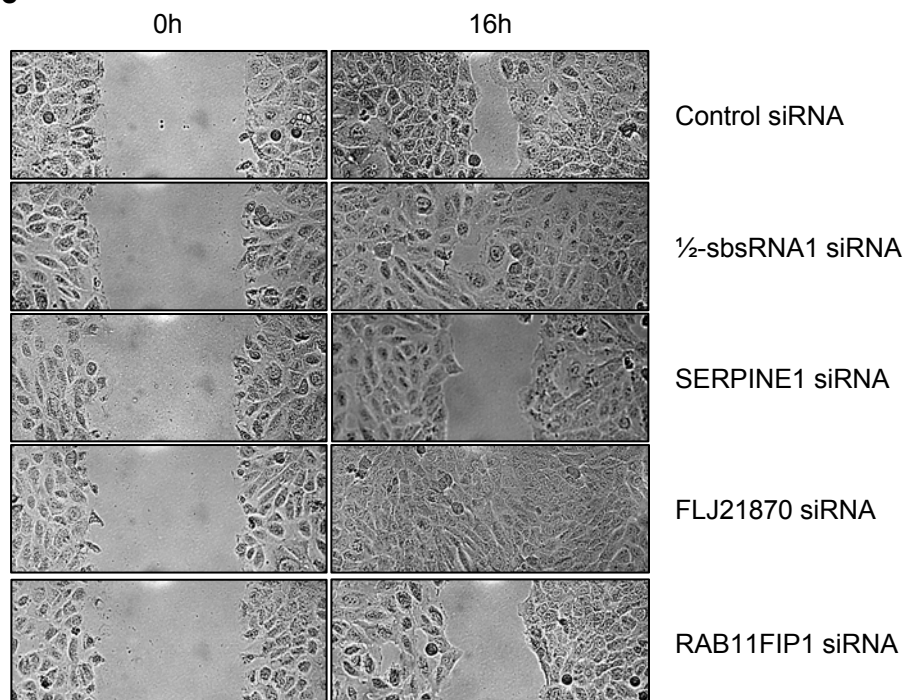

**a**

| lncRNA      | $\Delta G(\text{kcal/mol})^*$ |
|-------------|-------------------------------|
| 1/2-sbsRNA1 | 0                             |
| 1/2-sbsRNA2 | -416                          |
| 1/2-sbsRNA3 | -26.9                         |
| 1/2-sbsRNA4 | -28                           |

\* of predicted duplex formed between the lncRNA Alu element and the 3'UTR Alu element of BAG5 mRNA

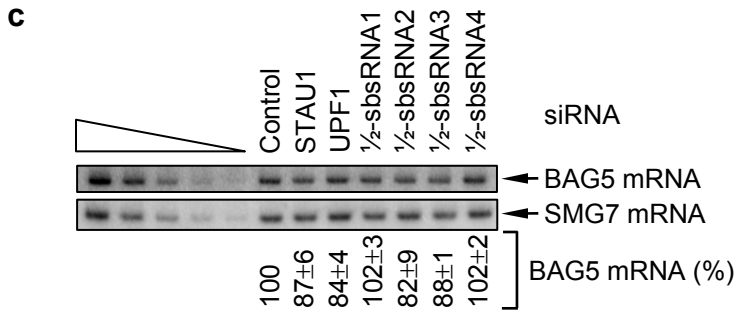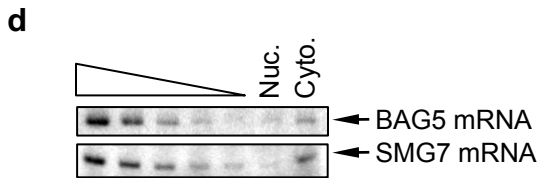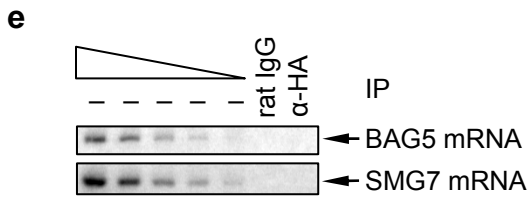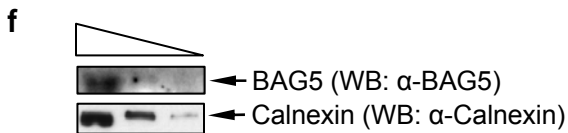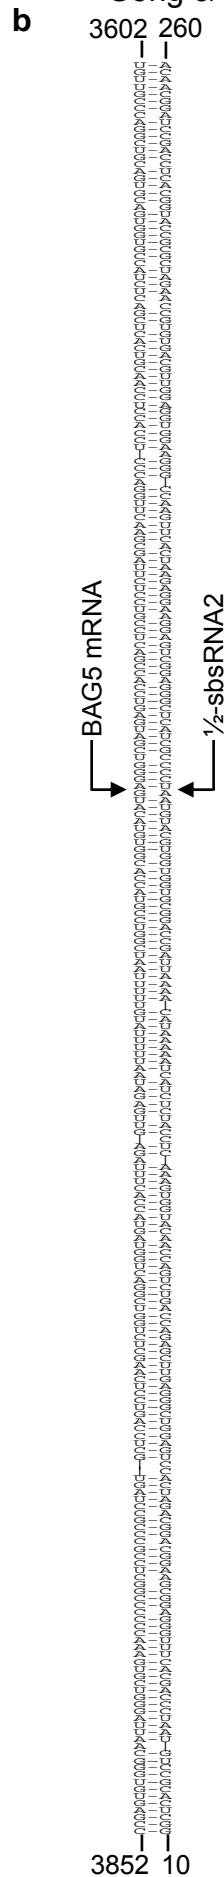

**Supplementary Table 1. Genes encoding transcripts that are upregulated at least 1.8-fold upon STAU1 downregulation and contain a single 3'UTR Alu element**

| Gene symbol | NCBI accession # | Fold upregulation * | Alu motif in 3'UTR | Full name of gene                                                                             |
|-------------|------------------|---------------------|--------------------|-----------------------------------------------------------------------------------------------|
| IFI44       | NM_006417        | 5.88                | AluSq              | interferon-induced protein 44                                                                 |
| FBLIM1      | NM_017556        | 4.71                | AluSz              | filamin-binding LIM protein 1                                                                 |
| CLDN11      | NM_005602        | 4.50                | AluJb              | claudin 11                                                                                    |
| PDLIM3      | NM_014476        | 3.97                | AluSx              | PDZ and LIM domain 3                                                                          |
| OASL        | NM_003733        | 3.86                | AluJo              | 2'-5'-oligoadenylate synthetase-like                                                          |
| TAF7L       | NM_024885        | 3.72                | FLAM_A             | TAF7-like RNA polymerase II, TATA box-binding protein (TBP)-associated factor, 50kDa          |
| NOX4        | NM_016931        | 3.59                | AluSg7             | NADPH oxidase 4                                                                               |
| AIM1        | NM_001624        | 3.34                | AluJb              | absent in melanoma 1                                                                          |
| SERPINE1    | NM_000602        | 3.16                | AluJo              | serpin peptidase inhibitor, clade E (nexin, plasminogen activator inhibitor type 1), member 1 |
| DCP2        | NM_152624        | 2.74                | AluSp              | DCP2 decapping enzyme homolog ( <i>S. cerevisiae</i> )                                        |
| EIF5A2      | NM_020390        | 2.73                | AluSx3             | eukaryotic translation initiation factor 5A2                                                  |
| CEP135      | NM_025009        | 2.50                | AluSx1             | centrosomal protein 135kDa                                                                    |
| LRRFIP1     | NM_004735        | 2.22                | AluSq2             | leucine-rich repeat (in FLII) interacting protein 1                                           |
| ZFP90       | NM_133458        | 2.20                | AluJb              | zinc-finger protein 90 homolog (mouse)                                                        |
| TP53        | NM_000546        | 2.20                | AluJb              | tumor protein p53                                                                             |
| PHLPP2      | NM_015020        | 2.05                | AluSx              | PH domain and leucine-rich repeat protein phosphatase 2                                       |
| EHHADH      | NM_001966        | 2.03                | AluJr              | enoyl-CoA, hydratase/3-hydroxyacyl CoA dehydrogenase                                          |
| CCDC125     | NM_176816        | 1.99                | AluY               | coiled-coil domain-containing 125                                                             |
| CDCP1       | NM_022842        | 1.98                | AluJb              | CUB domain-containing protein 1                                                               |
| NUAK2       | NM_030952        | 1.96                | AluSp              | NUAK family, SNF1-like kinase, 2                                                              |
| AKT2        | NM_001626        | 1.84                | AluJr              | v-akt murine thymoma viral oncogene homolog 2                                                 |
| APPL1       | NM_012096        | 1.83                | AluY               | adaptor protein, phosphotyrosine interaction, PH domain and leucine zipper-containing 1       |
| COL16A1     | NM_001856        | 1.81                | FLAM_A             | collagen, type XVI, alpha 1                                                                   |
| RIPK1       | NM_003804        | 1.81                | AluJo              | receptor (TNFRSF)-interacting serine-threonine kinase 1                                       |

\*Minimum fold upregulation in each of three independently performed microarray analyses (Kim et al, 2007)

**Supplementary Table 2. Features of lncRNAs that contain a single Alu element**

| lncRNA<br>accession # * | lncRNA Alu motif ** | $\Delta G$ (kcal/mol) of predicted duplexes formed between the Alu element of each<br>specified lncRNA and the 3'UTR Alu element of four proven SMD targets *** |                      |                   |                  |
|-------------------------|---------------------|-----------------------------------------------------------------------------------------------------------------------------------------------------------------|----------------------|-------------------|------------------|
|                         |                     | <u>SERPINE1 mRNA</u>                                                                                                                                            | <u>FLJ21870 mRNA</u> | <u>CDCP1 mRNA</u> | <u>MTAP mRNA</u> |
| ASO1026                 | FLAM_C              | -48.5                                                                                                                                                           | -100.5               | 0                 | -100.5           |
| ASO1113                 | AluSx               | 0                                                                                                                                                               | 0                    | -44.2             | -21.8            |
| ASO1151                 | FLAM_C              | 0                                                                                                                                                               | -60.9                | 0                 | -38.7            |
| ASO1162                 | AluSx               | -37.8                                                                                                                                                           | -43.7                | -12.8             | -31.8            |
| ASO1170                 | FRAM                | 0                                                                                                                                                               | -19.2                | -91.3             | 0                |
| ASO1178                 | FLAM_C              | 0                                                                                                                                                               | -60.7                | 0                 | -70.6            |
| ASO1183                 | SVA_A               | 0                                                                                                                                                               | -83.2                | -25.1             | -24.7            |
| ASO1195                 | FLAM_C              | 0                                                                                                                                                               | -81.4                | -21.1             | -65.1            |
| ASO1208                 | SVA_F               | -28.8                                                                                                                                                           | 0                    | 0                 | -45.6            |
| ASO1213                 | SVA_F               | -28.8                                                                                                                                                           | 0                    | 0                 | -45.6            |
| ASO1220                 | AluY                | -22.7                                                                                                                                                           | -90.5                | -18.5             | -83.9            |
| ASO1259                 | AluJb               | 0                                                                                                                                                               | -25.7                | -71.6             | 0                |
| ASO1267                 | AluJb               | -28.7                                                                                                                                                           | -21.2                | -107.9            | 0                |
| ASO1282                 | AluJb               | 0                                                                                                                                                               | 0                    | -90.6             | -19.9            |
| ASO1285                 | AluSx               | 0                                                                                                                                                               | -61.4                | 0                 | -38.9            |
| ASO1289                 | FLAM_C              | 0                                                                                                                                                               | 0                    | -55.8             | -23.4            |
| ASO1296                 | AluJb               | -12.5                                                                                                                                                           | -48.3                | -9.7              | -26.8            |
| ASO1320                 | FLAM_C              | -43                                                                                                                                                             | -28.4                | 0                 | -28.4            |
| ASO1321                 | AluJb               | -24.6                                                                                                                                                           | -54                  | 0                 | -17.4            |
| ASO1323                 | AluSx               | 0                                                                                                                                                               | -86.8                | 0                 | -42.1            |
| ASO1326                 | AluJb               | 0                                                                                                                                                               | -29.5                | -114.2            | 0                |
| ASO1362                 | FLAM_C              | 0                                                                                                                                                               | -21.9                | 0                 | -23.9            |
| ASO1379                 | FLAM_C              | 0                                                                                                                                                               | 0                    | -40.1             | 0                |
| ASO1392                 | AluJb               | 0                                                                                                                                                               | 0                    | -107.9            | 0                |
| ASO1409                 | AluJb               | -41.8                                                                                                                                                           | -90.2                | 0                 | -46.9            |
| ASO1410                 | AluJb               | -41.8                                                                                                                                                           | -90.2                | 0                 | -46.9            |
| ASO1433                 | FLAM_C              | 0                                                                                                                                                               | 0                    | -26.4             | 0                |
| ASO1445                 | tRNA-Ala-GCY_       | 0                                                                                                                                                               | -23                  | 0                 | -27.9            |
| ASO1446                 | AluSx               | 0                                                                                                                                                               | -85.2                | 0                 | -80.6            |
| ASO1450                 | tRNA-Ala-GCY_       | 0                                                                                                                                                               | 0                    | -32.9             | 0                |
| ASO1456                 | FLAM_C              | 0                                                                                                                                                               | 0                    | -34.8             | 0                |
| ASO1470                 | AluSx               | -18.8                                                                                                                                                           | 0                    | 0                 | -21.4            |
| ASO1476                 | AluJb               | -50                                                                                                                                                             | -106.8               | -18.5             | -107.4           |
| ASO1480                 | FLAM_C              | -13.5                                                                                                                                                           | -17.4                | -96.7             | 0                |
| ASO1483                 | AluSx               | 0                                                                                                                                                               | -68                  | -31.6             | -66.4            |
| ASO1487                 | AluJb               | -37.1                                                                                                                                                           | -83.3                | 0                 | -83.2            |
| ASO1488                 | FLAM_C              | 0                                                                                                                                                               | -25.5                | -42.7             | 0                |
| ASO1496                 | FLAM_C              | 0                                                                                                                                                               | 0                    | -66.8             | 0                |
| ASO1497                 | AluJb               | 0                                                                                                                                                               | -19.1                | -69.8             | -17.9            |
| ASO1498                 | AluSx               | 0                                                                                                                                                               | -18.4                | -103.8            | -24.4            |
| ASO1500                 | FLAM_C              | 0                                                                                                                                                               | -21.8                | -66.3             | -18.1            |
| ASO1503                 | FLAM_C              | 0                                                                                                                                                               | -24.1                | 0                 | 0                |
| ASO1511                 | tRNA-Thr-ACA        | 0                                                                                                                                                               | 0                    | 0                 | 0                |
| ASO1514                 | AluJb               | -49.6                                                                                                                                                           | -99.2                | 0                 | -94.3            |
| ASO1521                 | tRNA-Ala-GCY_       | 0                                                                                                                                                               | 0                    | 0                 | -19.5            |
| ASO1523                 | AluSx               | 0                                                                                                                                                               | -88.5                | 0                 | -43.8            |
| ASO1535                 | AluJb               | -48.5                                                                                                                                                           | -66.8                | 0                 | -66.3            |
| ASO1544                 | AluJb               | -48.1                                                                                                                                                           | -99.7                | 0                 | -96.4            |
| ASO1546                 | AluJb               | -48.3                                                                                                                                                           | -65.4                | -24.9             | -13.2            |
| ASO1566                 | FLAM_C              | 0                                                                                                                                                               | -17                  | -47.4             | -15.2            |
| ASO1569                 | AluSx               | 0                                                                                                                                                               | -22.8                | -71.5             | -27.2            |

|         |        |        |        |        |        |
|---------|--------|--------|--------|--------|--------|
| ASO1601 | AluSx  | 0      | -71    | -21.1  | -74.4  |
| ASO1632 | AluJb  | -99.5  | -222.1 | -24.7  | -84.2  |
| ASO1636 | AluJb  | -84.8  | -85.5  | -9.7   | -103.2 |
| ASO1668 | AluY   | 0      | 0      | -112.8 | 0      |
| ASO1674 | AluSx  | -35.7  | -53.6  | 0      | -116.7 |
| ASO1700 | AluY   | -46    | -122.6 | -35.1  | -125.6 |
| ASO1705 | FRAM   | 0      | 0      | -81.2  | -26.5  |
| ASO1714 | AluJb  | 0      | 0      | -135.9 | 0      |
| ASO1719 | AluSx  | 0      | -17.2  | -148.9 | -25.4  |
| ASO1721 | AluJb  | -119.7 | -99.2  | -22.9  | -77    |
| ASO1726 | AluSx  | 0      | 0      | -118.6 | 0      |
| ASO1729 | AluSx  | 0      | 0      | -107.3 | -25.2  |
| ASO1730 | AluJb  | 0      | 0      | -141.1 | 0      |
| ASO1736 | AluSx  | -70.3  | -258.5 | -31.4  | -230.1 |
| ASO1737 | AluY   | -68.2  | -339   | -22.6  | -235.5 |
| ASO1751 | AluSx  | 0      | -39.2  | -138.7 | 0      |
| ASO1754 | FRAM   | -10.9  | -29.3  | -103.9 | -14.9  |
| ASO1757 | FLAM_C | -110.8 | -163.4 | -18.1  | -88.9  |
| ASO1763 | FLAM_C | 0      | 0      | -167.3 | -23.4  |
| ASO1766 | AluJb  | -134.1 | -177.1 | -16.3  | -78.2  |
| ASO1768 | AluJb  | 0      | 0      | -128.2 | 0      |
| ASO1770 | AluY   | 0      | -26.7  | -175.9 | -32.5  |
| ASO1781 | AluSx  | -61.9  | -255.5 | -36.7  | -166   |
| ASO1787 | AluJb  | -57.9  | -236   | -49.9  | -104.8 |
| ASO1794 | FRAM   | 0      | -52.8  | -16.3  | -71.9  |
| ASO1803 | AluSx  | -16.5  | 0      | -214.9 | 0      |
| ASO1808 | AluJb  | 0      | -27.9  | -133.9 | -39.9  |
| ASO1810 | AluJb  | 0      | -28.4  | -189.3 | -32.6  |
| ASO1812 | AluSx  | -76.6  | -226.2 | 0      | -348.3 |
| ASO1818 | AluY   | -62.2  | -407.9 | -23.6  | -229.1 |
| ASO1821 | AluSx  | -45.5  | -108.9 | -19.5  | -126.2 |
| ASO1823 | AluJb  | -63.7  | -146.4 | -26.6  | -280.7 |
| ASO1825 | AluSx  | -54.1  | -118.7 | -23.7  | -120.8 |
| ASO1827 | AluSx  | -123.4 | -262.6 | 0      | -260   |
| ASO1829 | FLAM_C | -95.9  | -137.3 | -22.3  | -92.1  |
| ASO1841 | AluJb  | 0      | -22.9  | -99.6  | -20.8  |
| ASO1862 | AluSx  | 0      | 0      | -176.7 | -33    |
| ASO1871 | FLAM_C | -115.9 | -159.7 | -12.2  | -79.7  |
| ASO1876 | AluSx  | -114   | -203.4 | -11.3  | -197.5 |
| ASO1880 | AluJb  | -55.4  | -110.3 | -16.6  | -95.4  |
| ASO1885 | AluJb  | -13.5  | -16.3  | -358.2 | 0      |
| ASO1895 | AluJb  | -73.1  | -157   | -27    | -113.5 |
| ASO1897 | AluSx  | -70.1  | -101.1 | -18.5  | -121.4 |
| ASO1901 | AluSx  | -72.7  | -204.9 | -20.9  | -341.3 |
| ASO1906 | AluSx  | 0      | 0      | -193.9 | -30.6  |
| ASO1912 | AluSx  | -106.7 | -445.6 | -21.1  | -255.7 |
| ASO1928 | AluJb  | -88.5  | -208   | -8.3   | -105.5 |
| ASO1934 | AluJb  | 0      | 0      | -135.9 | 0      |
| ASO1957 | AluSx  | -65.9  | -232.4 | 0      | -300   |
| ASO1959 | AluSx  | 0      | -35.5  | -181.4 | -34    |
| ASO1966 | AluSx  | -16.5  | 0      | -214.9 | 0      |
| ASO1980 | AluSx  | 0      | -27.5  | -192.2 | -30.6  |
| ASO1993 | AluSx  | -26.6  | -136.8 | -38.8  | -77.6  |
| ASO1994 | AluJb  | -88.2  | -207.7 | -19.7  | -105.5 |
| ASO1995 | AluSx  | 0      | 0      | -118.6 | 0      |

|         |              |        |        |        |        |
|---------|--------------|--------|--------|--------|--------|
| ASO1998 | AluSx        | -108.2 | -444.2 | -27.6  | -264.2 |
| ASO2002 | AluJb        | -84.6  | -302.6 | 0      | -135.6 |
| ASO2003 | AluSx        | 0      | 0      | -118.6 | 0      |
| ASO2015 | AluSx        | 0      | 0      | -118.6 | 0      |
| ASO2016 | AluSx        | -31.5  | -49.3  | 0      | -125.8 |
| ASO2020 | AluSx        | 0      | 0      | -118.6 | 0      |
| ASO2026 | AluJb        | -77.8  | -113.2 | -23.1  | -99.1  |
| ASO2028 | AluSx        | -125.2 | -223.9 | -34.2  | -128.7 |
| ASO2029 | AluJb        | -77.8  | -113.2 | -23.1  | -99.1  |
| ASO2031 | AluSx        | -13.9  | 0      | -157.2 | -13.1  |
| ASO2037 | AluSx        | -76.9  | -116.5 | -22.4  | -103.5 |
| ASO2042 | FLAM_C       | 0      | 0      | -68.8  | 0      |
| ASO2046 | AluSx        | 0      | 0      | -118.6 | 0      |
| ASO2059 | FRAM         | -78    | -73    | -31.5  | -65.2  |
| ASO2066 | AluJb        | 0      | -21.7  | -121.2 | -25.9  |
| ASO2070 | AluSx        | -114.2 | -447.6 | -19.7  | -190.2 |
| ASO2087 | FLAM_C       | -116.1 | -163.8 | -36.5  | -87    |
| ASO2100 | FLAM_C       | 0      | 0      | -153.3 | 0      |
| ASO2101 | AluSx        | 0      | 0      | -179.1 | -29.8  |
| ASO2120 | AluJb        | 0      | 0      | -240.5 | -21.7  |
| ASO2124 | FLAM_C       | -89.4  | -102.7 | -37.4  | -30.7  |
| ASO2126 | AluJb        | -13.2  | -36.1  | -136   | -39.8  |
| ASO2127 | AluSx        | 0      | 0      | -210.2 | -26.2  |
| ASO2128 | FLAM_C       | -115.2 | -155.5 | 0      | -71.8  |
| ASO2131 | AluSx        | 0      | 0      | -159.1 | -16.3  |
| ASO2147 | tRNA-Arg-AGA | -23.7  | 0      | -19.3  | -19.8  |
| ASO2153 | AluJb        | 0      | -21.7  | -121.2 | -25.9  |
| ASO2160 | AluY         | -62.1  | -208.4 | -18.8  | -218.5 |
| ASO2168 | AluJb        | 0      | -25.1  | -144   | -30.9  |
| ASO2179 | AluJb        | 0      | -26.5  | -202.3 | 0      |
| ASO2181 | AluY         | -66.2  | -210.7 | -26.4  | -286.2 |
| ASO2185 | AluSx        | -70.8  | -233.4 | 0      | -360.9 |
| ASO2186 | AluSx        | -69.1  | -116   | -15.4  | -103.5 |
| ASO2188 | AluY         | 0      | -23.6  | -196.1 | -29.5  |
| ASO2192 | AluSx        | 0      | 0      | -118.6 | 0      |
| ASO2209 | AluSx        | -96.3  | -147.9 | -39.9  | -150.6 |
| ASO2218 | FRAM         | -60.9  | -79.6  | -20.1  | -114.9 |
| ASO2236 | AluSx        | 0      | -20    | -96.5  | -33.9  |
| ASO2239 | FLAM_C       | 0      | 0      | -114.3 | -40.9  |
| ASO2241 | AluSx        | 0      | -33.3  | -193.9 | -15.6  |
| ASO2242 | AluY         | -27.9  | -54.5  | 0      | -90.9  |
| ASO2262 | AluJb        | -116.5 | -279.2 | 0      | -105.5 |
| ASO2282 | AluY         | 0      | -12.7  | -165.3 | -29.5  |
| ASO2287 | AluSx        | 0      | 0      | -189.6 | -12.6  |
| ASO2299 | AluJb        | 0      | 0      | -78.4  | 0      |
| ASO2301 | AluJb        | -42.8  | -25.6  | -20.4  | -41    |
| ASO2319 | AluJb        | -50.9  | -60.1  | 0      | -17.9  |
| ASO2320 | AluSx        | 0      | -21.2  | -79.8  | -19.9  |
| ASO2321 | FLAM_C       | -41.3  | -53.5  | 0      | -16.2  |
| ASO2347 | FLAM_C       | -42.2  | -79.9  | 0      | -53.7  |
| ASO2356 | AluJb        | 0      | 0      | -40.7  | 0      |
| ASO2360 | AluSx        | 0      | -77.7  | 0      | -29.3  |
| ASO2362 | AluJb        | -27.9  | -21.2  | -98.8  | -24.4  |
| ASO2368 | AluJb        | -49.6  | -57.5  | 0      | -30.2  |
| ASO2370 | AluJb        | -24.2  | -12.3  | -23.4  | -31.8  |



|         |               |       |        |       |        |
|---------|---------------|-------|--------|-------|--------|
| ASO2373 | AluJb         | 0     | -14.4  | 0     | 0      |
| ASO2378 | AluSx         | 0     | 0      | -28   | 0      |
| ASO2385 | AluSx         | 0     | 0      | -46.7 | 0      |
| ASO2395 | FLAM_C        | 0     | -60.5  | -33.1 | -23.2  |
| ASO2414 | FLAM_C        | 0     | -68.3  | 0     | -53    |
| ASO2418 | AluSx         | 0     | -25.4  | -85.4 | -40.4  |
| ASO2443 | AluJb         | -25.9 | -41.8  | -12.2 | -36.7  |
| ASO2469 | AluJb         | -61.3 | -106.3 | -39.2 | -102.4 |
| ASO2474 | AluJb         | 0     | 0      | -28.3 | 0      |
| ASO2479 | AluJb         | -48.6 | -111.1 | -20.1 | -94.5  |
| ASO2488 | AluJb         | 0     | 0      | -39.3 | 0      |
| ASO2490 | tRNA-Ala-GCY_ | 0     | 0      | 0     | -21.7  |
| ASO2495 | AluJb         | -53.4 | -63.3  | -22.2 | -55.4  |
| ASO2510 | AluJb         | -39   | -72.6  | -7.2  | -48.6  |
| ASO2515 | AluJb         | -49.6 | -57.5  | 0     | -30.2  |
| ASO2518 | AluJb         | -57   | -120.5 | -11.7 | -99.6  |
| ASO2520 | AluJb         | 0     | 0      | -56.6 | 0      |
| ASO2532 | AluSx         | 0     | -41.8  | 0     | -24.8  |
| ASO2565 | AluSx         | -29.2 | -21.2  | -98.1 | 0      |
| ASO2570 | AluJb         | -21.4 | -63.4  | -19.8 | -68.6  |
| ASO2576 | FLAM_C        | 0     | 0      | -28.1 | 0      |
| ASO2580 | tRNA-Ala-GCY_ | -25.5 | 0      | -40.1 | 0      |
| ASO2593 | FRAM          | -22.9 | -52.3  | 0     | -38.1  |
| ASO2601 | AluSx         | 0     | -21.2  | -47.3 | -23    |
| ASO2603 | AluJb         | -49.5 | -90.4  | 0     | -105.2 |
| ASO2605 | FRAM          | -50.5 | -88.5  | -13.2 | -69    |
| ASO2608 | AluJb         | -34.2 | -40.3  | -20.3 | -50.1  |
| ASO2610 | AluSx         | -29.2 | -21.2  | -98.1 | 0      |
| ASO2616 | AluSx         | 0     | -77.7  | 0     | -29.3  |
| ASO2617 | AluJb         | 0     | -73.5  | 0     | -30.2  |
| ASO2620 | AluJb         | -35.9 | -56.8  | 0     | -64.5  |
| ASO2633 | AluSx         | 0     | -78.8  | -18.5 | -64    |
| ASO2634 | AluSx         | -51.4 | -87.7  | -22.2 | -65.3  |
| ASO2640 | AluSx         | -33.4 | -34.2  | -14.9 | -36.7  |
| ASO2643 | FLAM_C        | -58.7 | -66.3  | 0     | -64.9  |
| ASO2659 | FLAM_C        | -16.1 | -69.5  | 0     | -50    |
| ASO2665 | AluJb         | 0     | 0      | -41.9 | 0      |
| ASO2672 | AluSx         | 0     | 0      | -85.3 | -19.9  |
| ASO2673 | AluJb         | 0     | -22.1  | -27.7 | -26.3  |
| ASO2674 | FLAM_C        | 0     | 0      | -45.5 | 0      |
| ASO2684 | FLAM_C        | 0     | -61.4  | -15.7 | -61.1  |
| ASO2689 | AluJb         | -38   | -76.7  | -25.8 | -72.3  |
| ASO2704 | AluSx         | -31.4 | -96.2  | 0     | -84.5  |
| ASO2713 | AluJb         | -48.6 | -100.7 | -10.7 | -93.4  |
| ASO2719 | FLAM_C        | -49.7 | -97.9  | 0     | -50.6  |
| ASO2725 | AluSx         | -58.1 | -114.4 | -22.2 | -90.4  |
| ASO2741 | AluJb         | -12.1 | -68.5  | 0     | -75.8  |
| ASO2753 | FLAM_C        | -60.3 | -113.9 | 0     | -72.3  |
| ASO2759 | SVA_A         | -22.9 | 0      | 0     | -73.7  |
| ASO2768 | AluSx         | 0     | -13    | -70.9 | -20.5  |
| ASO2769 | AluSx         | 0     | 0      | -81.5 | 0      |
| ASO2774 | AluJb         | -13.9 | -73.1  | -18.6 | -66.6  |
| ASO2776 | FRAM          | 0     | -99.6  | 0     | -86.6  |
| ASO2785 | FLAM_C        | -17.7 | 0      | -54.6 | 0      |
| ASO2806 | AluSx         | -48.6 | -106.5 | -13.6 | -57.6  |

|         |               |       |        |        |        |
|---------|---------------|-------|--------|--------|--------|
| ASO2815 | FRAM          | -20.3 | -20    | -48.5  | -21.9  |
| ASO2834 | AluY          | 0     | 0      | -39.2  | -18.7  |
| ASO2846 | AluJb         | -24.6 | 0      | -74    | 0      |
| ASO2867 | tRNA-Ala-GCY_ | 0     | 0      | 0      | -22.9  |
| ASO2883 | AluSx         | 0     | -25.4  | -85.4  | -40.4  |
| ASO2894 | AluSx         | 0     | -21.7  | 0      | -33.4  |
| ASO2897 | AluJb         | -47.2 | -100.5 | -25.9  | -86.3  |
| ASO2907 | AluSx         | 0     | 0      | -20.1  | 0      |
| ASO2911 | AluJb         | -48.6 | -64.3  | -11.3  | -53.9  |
| ASO2913 | FRAM          | -28.4 | -30.6  | -50.6  | 0      |
| ASO2930 | AluJb         | -38   | -74.7  | -31.9  | -39    |
| ASO2931 | AluJb         | -20.8 | -109.6 | -23.7  | -104.3 |
| ASO2936 | tRNA-Ala-GCY_ | 0     | 0      | 0      | 0      |
| ASO2941 | tRNA-Ala-GCY_ | 0     | 0      | 0      | 0      |
| ASO2951 | tRNA-Ala-GCA  | 0     | 0      | 0      | 0      |
| ASO2966 | AluJb         | -46.8 | -110.7 | -13.2  | -95.9  |
| ASO2981 | AluSx         | -50.9 | -103.1 | 0      | -96.8  |
| ASO3003 | AluJb         | -24   | -20.8  | -110.2 | 0      |
| ASO3015 | AluSx         | -25.6 | -21.2  | -37.7  | 0      |
| ASO3025 | AluJb         | 0     | 0      | -56.1  | -18.9  |
| ASO3037 | AluJb         | -18.4 | -42.5  | -26.6  | -52    |
| ASO3061 | AluJb         | 0     | -21.2  | -111   | 0      |
| ASO3064 | FLAM_C        | 0     | 0      | -60.3  | 0      |
| ASO3070 | tRNA-Ala-GCY_ | 0     | 0      | -9.9   | 0      |
| ASO3086 | AluSx         | 0     | 0      | -30.1  | 0      |
| ASO3093 | FLAM_C        | -49.7 | -70.8  | 0      | -59.4  |
| ASO3103 | FLAM_C        | -30.9 | -52    | -20.1  | -46.7  |
| ASO3111 | FRAM          | -43   | -89.5  | 0      | -69.7  |
| ASO3112 | AluJb         | 0     | 0      | -57.2  | -24.3  |
| ASO3116 | AluJb         | 0     | 0      | -46.9  | 0      |
| ASO3137 | FLAM_C        | -52.7 | -112.4 | 0      | -82.2  |
| ASO3154 | AluJb         | -48.3 | -99.4  | 0      | -86.6  |
| ASO3167 | AluJb         | -32.2 | -51.7  | 0      | -59.9  |
| ASO3179 | tRNA-Ala-GCY_ | 0     | -18.9  | -18.7  | 0      |
| ASO3181 | tRNA-Ala-GCY_ | 0     | 0      | -12.7  | 0      |
| ASO3183 | FLAM_C        | 0     | -22.4  | -47.8  | -15.8  |
| ASO3200 | AluSx         | -25   | -76.1  | -18.6  | -71.2  |
| ASO3209 | FRAM          | -13.5 | 0      | -77.3  | 0      |
| ASO3222 | FLAM_C        | 0     | 0      | -52.2  | -26.8  |
| ASO3245 | AluJb         | -45   | -71.8  | 0      | -67.1  |
| ASO3260 | FLAM_C        | 0     | 0      | -33.6  | 0      |
| ASO3267 | AluJb         | 0     | -46.1  | 0      | -24.6  |
| ASO3268 | AluJb         | -23   | -34.2  | 0      | -43    |
| ASO3280 | tRNA-Thr-ACA  | -16.7 | -16.8  | -18.5  | 0      |
| ASO3281 | AluJb         | 0     | -21.8  | -85.3  | 0      |
| ASO3286 | FLAM_C        | -20.1 | -29.3  | -26.3  | -50.1  |
| ASO3290 | AluJb         | -17.2 | -107.2 | -11.3  | -95.9  |
| ASO3300 | AluSx         | -51.3 | -114.4 | 0      | -99.9  |
| ASO3303 | FLAM_C        | -53.7 | -20.6  | 0      | -43.6  |
| ASO3304 | FLAM_C        | -11.2 | -76.3  | -11.2  | -61.2  |
| ASO3307 | AluJb         | -24   | -27.9  | -102.1 | -24.1  |
| ASO3310 | FLAM_C        | 0     | -19.9  | -69.8  | -21    |
| ASO3329 | FRAM          | -23   | -50.1  | -30.4  | -42.3  |
| ASO3334 | FRAM          | -49   | -83    | 0      | -8.7   |
| ASO3347 | AluJb         | 0     | -18.7  | -24.8  | 0      |

|         |               |        |        |        |        |
|---------|---------------|--------|--------|--------|--------|
| ASO3351 | AluSx         | 0      | -59.7  | -30.3  | -23.2  |
| ASO3355 | AluSx         | 0      | 0      | -61.6  | -17.8  |
| ASO3357 | AluSx         | 0      | -39    | -25.5  | -40.3  |
| ASO3360 | BC200         | -63.7  | -35.2  | -20.1  | -35.8  |
| ASO3363 | tRNA-Ala-GCY_ | 0      | 0      | 0      | -29.6  |
| ASO3365 | tRNA-Ala-GCA  | 0      | 0      | 0      | 0      |
| ASO3369 | tRNA-Ala-GCY_ | -25.6  | 0      | 0      | 0      |
| ASO3378 | AluSx         | 0      | -22.4  | -59.1  | 0      |
| ASO3383 | tRNA-Ala-GCY_ | 0      | -31.3  | 0      | -25.7  |
| ASO3389 | AluJb         | 0      | -21.8  | -53.6  | -19.2  |
| ASO3390 | FLAM_C        | -32.9  | -62.4  | 0      | -25.1  |
| ASO3397 | FLAM_C        | 0      | 0      | -41.5  | 0      |
| ASO3406 | AluY          | -42.6  | -73.1  | 0      | -85.2  |
| ASO3413 | AluJb         | -40.7  | -104.3 | -21    | -94.6  |
| ASO3428 | AluSx         | 0      | 0      | -321.7 | -25.6  |
| ASO3436 | AluJb         | -85    | -97.7  | -34.7  | -126.7 |
| ASO3442 | AluJb         | -118.6 | -189.7 | 0      | -106.4 |
| ASO3455 | FLAM_C        | -100.3 | -46.3  | 0      | -49.5  |
| ASO3457 | AluSx         | -118.5 | -382.1 | -25.2  | -253   |
| ASO3459 | AluJb         | -75.1  | -94.2  | -20.3  | -74.7  |
| ASO3462 | AluY          | 0      | 0      | -205.2 | -29.2  |
| ASO3466 | AluJb         | -138.4 | -155   | -24.1  | -183.9 |
| ASO3467 | FLAM_C        | -99.8  | -74.3  | 0      | -71.5  |
| ASO3470 | AluSx         | 0      | 0      | -89    | -19.6  |
| ASO3476 | AluY          | 0      | -31.1  | -117.9 | -25.7  |
| ASO3478 | AluSx         | 0      | 0      | -135.9 | 0      |
| ASO3481 | AluJb         | 0      | -27.7  | -150.2 | -18.7  |
| ASO3488 | AluSx         | -66.4  | -261.9 | -19.1  | -203.1 |
| ASO3491 | AluJb         | -101.9 | -156.1 | -22.2  | -142.2 |
| ASO3493 | AluSx         | -122   | -263.5 | 0      | -252.5 |
| ASO3498 | AluJb         | 0      | -26.9  | -198.5 | -34.7  |
| ASO3502 | AluJb         | -29.9  | -29.8  | -96.7  | -31.2  |
| ASO3505 | AluSx         | -61.3  | -116   | -21.1  | -142.5 |
| ASO3506 | AluY          | -49.9  | -150.9 | 0      | -153.9 |
| ASO3517 | AluSx         | 0      | -17.2  | -216.8 | -36.6  |
| ASO3520 | AluSx         | 0      | 0      | -118.6 | 0      |
| ASO3521 | AluSx         | 0      | 0      | -118.6 | 0      |
| ASO3528 | AluY          | -62.7  | -326.8 | -18.1  | -403.8 |
| ASO3534 | AluSx         | 0      | -30.6  | -166.4 | -15.5  |
| ASO3535 | AluJb         | -118.2 | -88.2  | -20.6  | -107.8 |
| ASO3539 | AluSx         | 0      | 0      | -93    | 0      |
| ASO3545 | FRAM          | -59.2  | -66.7  | -39.3  | -85.4  |
| ASO3546 | AluSx         | -98.4  | -352.8 | -26.7  | -144   |
| ASO3548 | AluSx         | -101.8 | -214.3 | 0      | -163.2 |
| ASO3556 | AluSx         | -125.2 | -223.9 | -34.2  | -128.7 |
| ASO3557 | AluY          | 0      | 0      | -100.8 | 0      |
| ASO3563 | AluSx         | -80.9  | -124.3 | -18.8  | -145.5 |
| ASO3566 | FRAM          | -41.7  | -44.4  | 0      | -82.3  |
| ASO3573 | FRAM          | -42.8  | -56.2  | -33    | -55    |
| ASO3583 | AluSx         | 0      | 0      | -139   | -29.2  |
| ASO3584 | AluSx         | 0      | 0      | -149.3 | -31.3  |
| ASO3586 | FLAM_C        | -99.6  | -83.9  | 0      | -59.4  |
| ASO3593 | AluSx         | -109.1 | -245.4 | -18.8  | -245.8 |
| ASO3595 | AluSx         | -65.5  | -111.8 | 0      | -125   |
| ASO3601 | AluSx         | 0      | 0      | -82.9  | 0      |

|         |        |        |        |        |        |
|---------|--------|--------|--------|--------|--------|
| ASO3604 | FRAM   | -87.8  | -65    | 0      | -78.3  |
| ASO3606 | AluSx  | -117.8 | -362.6 | -14.5  | -248.3 |
| ASO3609 | AluY   | 0      | -31.9  | -192   | -19.3  |
| ASO3629 | AluSx  | 0      | 0      | -211.8 | 0      |
| ASO3630 | AluSx  | -95.6  | -420.4 | -17.1  | -210.7 |
| ASO3633 | FLAM_C | -54.9  | -96.3  | 0      | -112.2 |
| ASO3635 | AluSx  | -74.1  | -220.9 | -43.4  | -163.2 |
| ASO3645 | AluSx  | 0      | 0      | -214   | -39.8  |
| ASO3661 | AluSx  | 0      | -89.9  | -10.6  | -72.5  |
| ASO3667 | AluSx  | 0      | -19.6  | -153.7 | -26.3  |
| ASO3668 | AluSx  | -45.7  | -110.5 | -42.2  | -100.3 |
| ASO3673 | AluY   | 0      | 0      | -71.1  | 0      |
| ASO3674 | FLAM_C | 0      | -22.8  | -60.8  | 0      |
| ASO3680 | FLAM_C | -118.4 | -178.6 | -23.2  | -77.3  |
| ASO3682 | AluJb  | -62.4  | -85.8  | 0      | -119.4 |
| ASO3690 | AluSx  | -74.1  | -220.9 | -43.4  | -163.2 |
| ASO3695 | AluSx  | 0      | 0      | -104.4 | 0      |
| ASO3698 | AluSx  | -12.5  | 0      | -124.8 | 0      |
| ASO3710 | FLAM_C | -99.8  | -77.7  | 0      | -59.6  |
| ASO3717 | AluSx  | 0      | 0      | -100.3 | 0      |
| ASO3720 | AluJb  | -155.7 | -182.1 | -11.4  | -89.8  |
| ASO3721 | AluSx  | 0      | 0      | -118.6 | 0      |
| ASO3722 | AluSx  | -65.5  | -111.8 | 0      | -125   |
| ASO3735 | AluSx  | 0      | 0      | -118.6 | 0      |
| ASO3739 | AluSx  | 0      | -19.8  | -207   | -25.6  |
| ASO3742 | AluSx  | 0      | -29.8  | -231.9 | -16.3  |
| ASO3745 | AluSx  | -86.5  | -350.5 | -25.8  | -260.7 |
| ASO3746 | AluSx  | 0      | -34.7  | -211.3 | -20.8  |
| ASO3747 | AluJb  | -50.4  | -98.4  | -11.4  | -68.1  |
| ASO3755 | FLAM_C | 0      | 0      | -98.3  | -27.2  |
| ASO3761 | AluSx  | -61.3  | -109.1 | 0      | -119.2 |
| ASO3780 | AluSx  | -66.5  | -127.9 | -20.1  | -134   |
| ASO3803 | AluSx  | -124.7 | -308.8 | -20.4  | -202   |
| ASO3804 | FLAM_C | -120.1 | -124.7 | 0      | -75.9  |
| ASO3809 | AluSx  | 0      | 0      | -118.6 | 0      |
| ASO3813 | AluSx  | -13.9  | 0      | -157.2 | -13.1  |
| ASO3817 | FRAM   | -60.8  | -97.6  | -22.6  | -107.7 |
| ASO3820 | AluJb  | 0      | 0      | -100.4 | -18.4  |
| ASO3821 | AluJb  | -82.1  | -178.7 | -16.3  | -101.7 |
| ASO3822 | AluSx  | 0      | 0      | -163.3 | -18.9  |
| ASO3837 | AluJb  | -122.4 | -163.1 | -8     | -142.8 |
| ASO3838 | AluSx  | 0      | 0      | -118.6 | 0      |
| ASO3847 | AluY   | -47.3  | -173.4 | -26.4  | -167.5 |
| ASO3851 | AluSx  | -112.6 | -304.3 | -34.7  | -172.8 |
| ASO3861 | AluJb  | -134.1 | -177.1 | -16.3  | -78.2  |
| ASO3864 | AluSx  | -107.6 | -235.8 | -30.3  | -249.5 |
| ASO3872 | FLAM_C | 0      | 0      | -124.5 | 0      |
| ASO3873 | AluSx  | -65.2  | -207.1 | -20.8  | -342   |
| ASO3874 | AluSx  | 0      | 0      | -159.1 | -16.3  |
| ASO3875 | AluSx  | 0      | 0      | -118.6 | 0      |
| ASO3876 | AluJb  | 0      | 0      | -71.1  | 0      |
| ASO3878 | AluY   | 0      | 0      | -112.6 | 0      |
| ASO3881 | AluJb  | -99.6  | -92.1  | -19.2  | -120.7 |
| ASO3882 | FLAM_C | 0      | -30.9  | -68.7  | 0      |
| ASO3891 | AluSx  | -13.5  | -17.2  | -127.7 | -17.6  |

|         |       |        |        |        |        |
|---------|-------|--------|--------|--------|--------|
| ASO3893 | AluY  | -69.7  | -202.2 | -24.6  | -404.1 |
| ASO3900 | AluJb | -91.4  | -119.5 | 0      | -89.1  |
| ASO3902 | AluSx | 0      | -15.6  | -189.1 | -27    |
| ASO3906 | AluSx | 0      | 0      | -159.1 | -16.3  |
| ASO3908 | AluJb | -69.8  | -157.8 | -28.7  | -88.9  |
| ASO3911 | AluSx | 0      | -28.8  | -302.9 | -21.1  |
| ASO3913 | AluSx | -98.4  | -352.8 | -26.7  | -144   |
| ASO3946 | AluJb | -75.1  | -94.2  | -20.3  | -74.7  |
| ASO3947 | AluJb | -150.2 | -214.4 | -22.2  | -106.5 |
| ASO3948 | AluY  | 0      | 0      | -115.4 | 0      |
| ASO3950 | FRAM  | -67.6  | -103.4 | -13.6  | -64.1  |
| ASO3952 | AluSx | 0      | -26.9  | -105.7 | -25    |
| ASO3960 | AluSx | -86.5  | -350.5 | -25.8  | -260.7 |
| ASO3961 | AluSx | -111.4 | -360.3 | -39.9  | -262.4 |
| ASO3973 | AluJb | -32    | 0      | -298.5 | 0      |
| ASO3974 | AluSx | -99    | -366.7 | -36.2  | -262.2 |

\*From Antisense lncRNA Pipeline (Engstrom et al, 2006)

\*\*Motif search using REPEATMASKER for Alu sequences within the specific lncRNA

\*\*\*Free energy ( $\Delta G$ ) calculation considered duplexes that contain  $\geq 10$  continuous basepairs;

otherwise, free energy was designated to be 0

Grey highlights denote studied lncRNAs: ASO1998,  $\frac{1}{2}$ -sbsRNA4; ASO3488,  $\frac{1}{2}$ -sbsRNA3; ASO3667,  $\frac{1}{2}$ -sbsRNA2; ASO3720,  $\frac{1}{2}$ -sbsRNA1

**Supplementary Table 3. Comparison of RT-sqPCR shown in Fig. 1 and RT-qPCR \***

| siRNA   |                          | RT-sqPCR ** |        |           | RT-qPCR |        |           |
|---------|--------------------------|-------------|--------|-----------|---------|--------|-----------|
|         |                          | Control     | STAU1  | ½-sbsRNA1 | Control | STAU1  | ½-sbsRNA1 |
| Fig. 1b | ½-sbsRNA1                | 100         | 103±5  | 61±4      | 100     | 107±4  | 64±3      |
|         | SERPINE1 mRNA            | 100         | 451±5  | 308±5     | 100     | 443±7  | 336±10    |
|         | FLJ21870 mRNA            | 100         | 325±15 | 200±10    | 100     | 303±22 | 201±2     |
| Fig. 1c | FLUC-SEPRINE1 3'UTR mRNA | 13±5        | 82±7   | 44±3      | 11±7    | 82±4   | 48±4      |
|         | FLUC-FLJ21870 3'UTR mRNA | 11±3        | 93±7   | 65±6      | 16±5    | 92±6   | 68±3      |

\* sqPCR and qPCR used the same RT reactions

\*\* See Fig. 1c legend for details

**Supplementary Table 4. Primers for RT-sqPCR and RT-qPCR**

| RNA                                                          | Sense primer                   | Antisense primer               |
|--------------------------------------------------------------|--------------------------------|--------------------------------|
| ½-sbsRNA1                                                    | 5'-CAGCATTCTGAGTAGCTGGGATC-3'  | 5'-CAGTTGTAAGCATATTTGGGTTAC-3' |
| Primer #1 (Supplementary Fig. 3c)                            | 5'-CAGCATTCTGAGTAGCTGGGATC-3'  | ↓                              |
| #2                                                           | 5'-CCTTCCAACCTCAGCATTCTGAG-3'  |                                |
| #3                                                           | 5'-GCTCAAGCAATCCTTCCAACCTC-3'  |                                |
| #4                                                           | 5'-TCTTTTAACTCCTGGGCTCAAGC-3'  |                                |
| #5                                                           | 5'-GGCTGGAATACAGTGGTGTGATC-3'  |                                |
| #6                                                           | 5'-CAGTCTCACTCTGTTGCCAGGC-3'   |                                |
| #7                                                           | 5'-AAAGGAGAGACAGTCTCACTCTG-3'  |                                |
| #8                                                           | 5'-AGGACAATGACCCAAGAAGTAGG-3'  |                                |
| #9                                                           | 5'-CCTTTGACAAAGGACAATGACCC-3'  |                                |
| #10                                                          | 5'-GGACTTCCTCTGGCATGTAGG-3'    |                                |
| SMG7 mRNA                                                    | 5'-CCAAAGGAGACCATCTGACC-3'     | 5'-TTCACCTCATCTCGGCTTTCC-3'    |
| SERPINE1 mRNA                                                | 5'-ACCGCCAATCGCAAGGCACC-3'     | 5'-GCTGATCTCATCCTTGTTC-3'      |
| FLJ21870 mRNA                                                | 5'-AACGACCTGTTAAAGGCCACTC-3'   | 5'-TCCTTACTTTGCAGGCATCCAG-3'   |
| FLUC mRNA                                                    | 5'-AATACGACTCACTATAGGGA-3'     | 5'-TCTAGAGGATAGAATGGCG-3'      |
| MUP mRNA                                                     | 5'-CTGATGGGGCTCTATG-3'         | 5'-TCCTGGTGAGAAGTCTCC-3'       |
| ½-sbsRNA1 (Fig. 2a, Supplementary Fig. 6b only)              | 5'-CAGCATTCTGAGTAGCTGGGATC-3'  | 5'-GAACCTGTACCCTTCAGCTTACC-3'  |
| ½-sbsRNA1 <sup>R</sup> (Fig. 2a, Supplementary Fig. 6b only) | 5'-CAGCATTCTGAGTAGCTGGGATC-3'  | 5'-GAACCCATACAGTTCAGCTCAGA-3'  |
| IL7R mRNA                                                    | 5'-AAGTGGCTATGCTCAAATG-3'      | 5'-TTCAGGCACTTTACCTCCAC-3'     |
| ½-sbsRNA2                                                    | 5'-GTCCAGGAAGAAGGTGCAAAG-3'    | 5'-GGCTACCATATTGGACAGCAC-3'    |
| ½-sbsRNA3                                                    | 5'-CTAAATCTTCCCATGAAATAGGTG-3' | 5'-GGCCTTTGATAGAAATGTGTAGG-3'  |
| ½-sbsRNA4                                                    | 5'-GGCGTTTGTAGATCACTCCTTC-3'   | 5'-ATGCGTGGTGAAACTCAACTGG-3'   |
| GAPDH mRNA                                                   | 5'-AAGGTCGGAGTCAACGGATTTG-3'   | 5'-ATGACAAGCTTCCCGTTCTCAG-3'   |
| RAB11FIP1 mRNA                                               | 5'-CCTGCTGAAGACCTTGTGAGAAG-3'  | 5'-AGGATGAAGTCGGGGCTTGAC-3'    |
| CDCP1 mRNA                                                   | 5'-GCAAGGTCTACCTGAGGACC-3'     | 5'-CAGTCAAGTCCACAGTCCTTGG-3'   |
| MTAP mRNA                                                    | 5'-TCTTGTGCCAGAGGAGTGTG-3'     | 5'-CCACCGAAACTGCTTCCTCG-3'     |
| BAG5 mRNA                                                    | 5'-CCCAGTGGGAGTGCTTGTGAAA-3'   | 5'-AAGACGTTCTGTCTCCTGTGCT-3'   |
